# Supplementary material for: Resolving the conflict between antibiotic production and rapid growth by recognition of peptidoglycan of susceptible competitors
Source: PubMed Central journal article supplement (PMC8776889; doi:10.1038/s41467-021-27904-2), 2022-01-20
Supplement: 41467_2021_27904_MOESM2_ESM.pdf [file 41467_2021_27904_MOESM2_ESM.pdf]

## **Description of Supplementary Data Files**

### **File Name: Supplementary Data 1**

Description: File showing p- values from main figure 3, 4a, 4b, 4d, 5a, 5b, 5d, 6a, 8a, 8b, 8d and Supplementary figure 23.
